# Supplementary material for: A Process Evaluation of the National Implementation of a Bundle for Central Venous Catheter Care for Hemodialysis
Source: PubMed Central journal article supplement — Kidney360. 2023 Feb 10;4(4):e496–504. doi: 10.34067/KID.0000000000000076 (PMC10278776; doi:10.34067/kid.0000000000000076), 2023-02-10
Supplement: kidney360-4-e496-s001.pdf [file kidney360-4-e496-s001.pdf]

## REDUCTION – Interventions

1. At the time of catheter insertion
  - 1.1. Surgical aseptic technique (hand hygiene, sterile gloves, surgical mask, eye protection and gown), and a sterile environment (sterile surgical field on the patient) and/or a sterile room as per unit availability **MUST** be applied.
  - 1.2. An antiseptic solution using a minimum of 2% chlorhexidine with 70% alcohol **MUST** be used
    - 1.2.1. For those who cannot tolerate chlorhexidine, povidone–iodine or 70% alcohol may be used
  - 1.3. Site of insertion
    - 1.3.1. The right internal jugular vein is the best site for catheter insertion
    - 1.3.2. Catheters in the subclavian vein should be avoided due to incidence of central vein stenosis.
    - 1.3.3. Avoid femoral catheters where possible
  - 1.4. We do not recommend any specific catheter type
  - 1.5. Ultrasound guided catheter placement is recommended if the resources are available
  - 1.6. Semi permeable transparent dressing **MUST** be applied to the line. If a patient is allergic to these dressings, then an alternative appropriate dressing may be used.
  - 1.7. All patients **MUST** receive education on the following topics
    - 1.7.1. Vascular access care
    - 1.7.2. Hand hygiene
    - 1.7.3. Risks related to catheter use
    - 1.7.4. Recognizing signs of infection
    - 1.7.5. Instructions for access management when away from the dialysis unit
    - 1.7.6. To ensure that their catheter and exit site are kept dry.
    - 1.7.7. To seek assistance from dialysis should a dressing become wet, soiled or leak, or if the catheter itself begins to slip out
    - 1.7.8. To **NOT** shower in the first 72 hours after catheter insertion. After 72 hours, in order to have a shower, the catheter site must be covered with waterproof material.
  - 1.8. All patients **SHOULD** receive a copy of the REDUCTION catheter care sheet

## 2. Catheter maintenance

- 2.1. Hand hygiene, sterile gloves, a plastic apron, and aseptic technique (hand hygiene, gloves) **MUST** be applied at all occasions of catheter access
  - 2.1.1. An antiseptic solution using a minimum of 2% chlorhexidine with 70% alcohol must be used
  - 2.1.2. For those unable to tolerate chlorhexidine, povidone–iodine or 70% alcohol may be used
- 2.2. Dressing must be changed at least every 7 days and each time the dressing appears visibly soiled or loose
- 2.3. We do **NOT** recommend the routine use of mupirocin ointment or medicated honey at the catheter exit site.
- 2.4. All units **MUST** use **at least one** of the following specific interventions aimed at prophylaxis against catheter related bacteraemia\*
  - 2.4.1. Impregnated dressings (such as chlorhexidine impregnated patch or sponge) at the catheter exit site and/or
  - 2.4.2. Anti-microbial (e.g. citrate or taurolidine based) or anti-bacterial (e.g. gentamicin) catheter locking solutions #
- 2.5. All patients must be advised to ensure that their catheter and exit site are kept dry. Patients must be advised to seek assistance from dialysis should a dressing become wet, soiled or leak, or if the catheter itself begins to slip out.
- 2.6. All patients should receive a copy of the REDUCTION catheter care sheet as above
- 2.7. All patients must receive education on the following topics
  - 2.7.1. Vascular access care
  - 2.7.2. Hand hygiene
  - 2.7.3. Risks related to catheter use
  - 2.7.4. Recognizing signs of infection
  - 2.7.5. Instructions for access management when away from the dialysis unit
- 2.8. All patients must be advised **NOT** to shower in the first 72 hours after catheter insertion. After 72 hours, in order to have a shower, the catheter site must be covered with waterproof material.

\*check manufacturer's instructions when choosing the intervention to ensure compatibility with catheters

#with the use of gentamicin locks, monitoring of antibiotic resistance should be considered as per hospital policy

## 3. Catheter removal

- 3.1. Catheters **MUST** be removed as soon as it is clinically identified that they are no longer needed and within a maximum of 2 weeks of their last use.
- 3.2. Non-Tunnelled catheters should be changed to tunnelled catheters as soon as possible. Non-tunnelled femoral catheters should not be in place for more than 5 days, and non-tunnelled upper limb catheters– should not be in place for more than 7 days.
- 3.3. Catheters must be removed when there are signs of catheter related infections except in extenuating cases
- 3.4. Re-wiring of catheters is **NOT** recommended in the setting of any catheter related infection

# FACT SHEET

## Caring for your dialysis catheter

Your dialysis catheter is used for exchanging blood between yourself and the haemodialysis machine. Taking good care of your catheter helps make it last longer, and will reduce your risk of infections.

Your healthcare team will teach you about how to look after your catheter. Follow their instructions on how to care for your catheter and use the information below as a reminder.

### Do's

- ✓ Ensure that your catheter dressing is intact, clean and dry at all times.
- ✓ Your dressing must be changed at least every 7 days, and each time the dressing appears visibly dirty or loose.
- ✓ 3 days after the catheter has been put in, you can shower with a waterproof cover over the catheter dressing. Should your dressing become wet whilst washing, it will need to be changed promptly by renal unit staff or someone who has received education in catheter care.
- ✓ If you have fevers and/or chills, then present to the Emergency Department IMMEDIATELY as this may mean that you have a very serious infection.
- ✓ Contact your renal unit as soon as possible if there is:
  - Discomfort/pain
  - Redness
  - Swelling
  - Discharge from your catheter exit site
- ✓ Thoroughly wash your hands before touching your catheter and dressing.
- ✓ Check your catheter for any damages such as cracks or holes.
- ✓ If your catheter moves around, or becomes caught in clothing, use tape to attach it to your skin.
- ✓ Make sure that your catheter is well protected when playing contact sports.
- ✓ Always ask your healthcare team if you are unsure about caring for your catheter.
- ✓ Discuss with your renal team whether you should have an Arteriovenous Fistula (AVF) created if you are going to have haemodialysis for a long time.

## Don'ts

---

- ❌ Do not touch, pull, scratch or pinch your catheter or the catheter dressing.
- ❌ Do not use sharp objects near your catheter.
- ❌ Do not shower or bath in the first 3 days after your catheter is put in.
- ❌ Do not swim until receiving advice from your healthcare team.
- ❌ Do not let anyone access your catheter for any purpose other than dialysis (other than for a major medical emergency).
- ❌ Do not allow anyone to touch your catheter without washing their hands, wearing gloves, and a plastic apron.
- ❌ Do not place or apply any pressure to your catheter (such as when holding or carrying an object).

## Acknowledgements

---

This fact sheet was developed and reviewed by the REDUCTION Project Investigators, Kidney Health Australia, and the Kidney Health Australia National Consumer Council.

For more information about caring for your dialysis catheter please contact the Kidney Health Australia free call Kidney Helpline on 1800 454 363, or visit [kidney.org.au](http://kidney.org.au) to access free health literature.

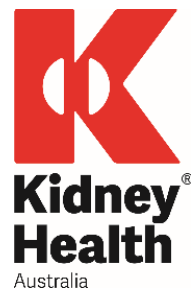

**REDUCTION**

REDUcing the burden of dialysis  
Catheter ComplicaTIONS: a National approach

## Appendix 3: Interview Guide

### PRE-IMPLEMENTATION INTERVIEWS

1. What's your experience of being a part of the REDUCCTION project?
  - Do you understand the aims of the project?
  - What/how was the **previous data collection method before the REDUCCTION data collection** process started?
  - What are your views about **both methods of data collection**? You find the REDUCCTION tool **easier or harder** to use? **Easier to find the infection rate**? how often do you check for infection rate?
2. What are your views about the REDUCCTION project?
  - Do you know of any other units doing this project?
  - What does your unit want to achieve from this?
  - What do you think the difficulties would be in implementing a new intervention?
3. Do you know what the intervention is going to be? What do you think the intervention will/should be?
4. Have you had any experience in implementation of other interventions? Describe?
  - *If yes, How did it go? (If it went well) Why do you think it was accepted and implemented easily? What do you think were the enablers for implementation (if it had flopped) What do you think went wrong?*
5. Is there any other quality improvement initiatives that have been started after the commencement of REDUCCTION

Any other comments, suggestions, experiences in relation to haemodialysis and REDUCCTION.

Demographic questions:

- How old are you?
- How many years have you been working in nephrology?
- What is your current job title?

### POST-IMPLEMENTATION INTERVIEWS

What do you understand the care bundle to be? Is this what you *thought* the care bundle would be?

#### Current Practice

1. If you think about your current practice using this bundle, which aspects of the bundle have been easy to use/do? Which have been difficult?
2. Has using the care bundle/intervention been a change in practice for you?
  - **If yes:** Describe how it is different now? Which aspects are different from what you did before?
3. Do you do anything additional or different from the care bundle? If yes, please describe.
  - **NB:** If participant is already doing what is in the care bundle, go through each process, eg, What is the skin preparation they are doing now? Was it the same earlier too? Same for dressing...
4. Is there somewhere you document if you vary from the bundle?
5. Have you noticed others doing anything different or additional? Describe.

#### Process of implementing Intervention/Care Bundle

6. Can you think back to when it was implemented and tell me what happened?  
(Prompts: was there in-service? Meetings? Sessions? Online modules? Does someone have the role to implement the bundle? Make sure staff follow it?)
7. How did you feel about the implementation? (prompts: was it enough, too much?)
8. OK so, how did it go?
  - *(If it went well)* Why do you think it was accepted and implemented easily? What do you think helped the implementation to go well?
  - *(If it had flopped)* What do you think went wrong/what was not helpful?
9. How do new staff (since the bundle started) find out how to implement/use the care bundle?

**For sites which have had the intervention running for a longer period:**

10. Are you still using the care bundle the same way that it was implemented initially?
  - If yes - what has sustained the practice change?
  - If not - what do you do now? Was there a problem? What do you think could have been done to make it feasible?)
11. Have there been any other changes to practice or quality improvement initiatives that have started since the commencement of the new care bundle?

**Catheter Care Sheet for patients:**

12. Do you give the REDUCCTION catheter care sheet to the patients?
  - When? Is there any other information you give them?
  - If yes: How is it received?

**Data Collection:**

13. Are you still using the REDUCCTION data collection tool (on the iPad)?
14. What are your views about the REDUCCTION tool? Is it easy to use?
15. Can you find the infection rate? If yes, how often do you check for infection rate?
16. Are you going to continue using the REDUCCTION data collection tool even after the project is completed? Why?
  - *If not:* would you like to change to another method? Why?
17. With the sorts of patients you see, do you find the care bundle appropriate for their specific needs? If No, explain, give an example.

## 2 Study Investigators

### 2.1 List of Trial Investigators

| Institution            | First name    | Last name     |
|------------------------|---------------|---------------|
| Alice Springs Hospital | Senthil Kumar | Balakrishnan  |
| Alice Springs Hospital | David         | Fernandes     |
| Armadale Hospital      | Hemant        | Kulkarni      |
| Armadale Hospital      | Casey         | Light         |
| Armadale Hospital      | Jo            | Ryan          |
| Auckland Hospital      | Emma          | Marsh         |
| Auckland Hospital      | David         | Semple        |
| Alfred Health          | Omar          | Tombocon      |
| Alfred Health          | Rowan         | Walker        |
| Alfred Health          | Scott         | Wilson        |
| Austin Health          | Vilma         | Lleva         |
| Austin Health          | Lucy          | Mwangi        |
| Austin Health          | Peter         | Mount         |
| Austin Health          | Maree         | Ross-Smith    |
| Austin Health          | Marieke       | Veenendaal    |
| Barwon Health          | Vicki         | Smith         |
| Barwon Health          | Christine     | Somerville    |
| Cairns Hospital        | Shaun         | Davidson-West |
| Cairns Hospital        | Natalie       | Grainer       |
| Cairns Hospital        | Stella        | Green         |
| Cairns Hospital        | Murty         | Mantha        |
| Cairns Hospital        | Kati          | Thiessen      |
| Canberra Hospital      | Girish        | Talaulikar    |
| Canberra Hospital      | Alison        | Winsbury      |
| Canberra Hospital      | Irene         | Yao           |
| Canberra Hospital      | Emily         | Neville       |
| CARI                   | Pamela        | Lopez-Vargas  |
| Concord Hospital       | Khalilah      | Marquez       |
| Concord Hospital       | Mona          | Razavian      |
| Concord Hospital       | Lisa          | Tienstra      |
| Concord Hospital       | Glenn         | Stewart       |
| Eastern Health         | Cathy         | Chan          |
| Eastern Health         | Peta          | McLean        |
| Eastern Health         | Lawrence      | McMahon       |
| Eastern Health         | Matthew       | Roberts       |
| Eastern Health         | Dong          | Wang          |
| Fiona Stanley Hospital | Monika        | Chang         |
| Fiona Stanley Hospital | Anna          | Chiam         |
| Fiona Stanley Hospital | Duncan        | Wright        |
| Fiona Stanley Hospital | Orla          | O'Brien       |
| Fiona Stanley Hospital | Ramyasuda     | Swaminathan   |

| Institution                            | First name    | Last name    |
|----------------------------------------|---------------|--------------|
| Fiona Stanley Hospital                 | Samadhi       | Wimalasena   |
| Fiona Stanley Hospital                 | Harish        | Puttagunta   |
| Flinders Medical Centre                | Jeffrey       | Barbara      |
| Flinders Medical Centre                | Amanda        | Luke         |
| Flinders Medical Centre                | Margaret      | Pummeroy     |
| Flinders Medical Centre                | Kim           | Torpey       |
| Gold Coast Hospital and Health Service | Gemma         | Nicholls     |
| Gold Coast Hospital and Health Service | Amy           | Swinbank     |
| Gold Coast Hospital and Health Service | Thomas        | Titus        |
| John Hunter Hospital                   | Peter         | Choi         |
| John Hunter Hospital                   | Ginger        | Chu          |
| John Hunter Hospital                   | Leanne        | Garvey       |
| John Hunter Hospital                   | Alastair      | Gillies      |
| Kidney Health Australia                | Shilpa        | Jesudason    |
| Liverpool Hospital                     | Josephine     | Chow         |
| Liverpool Hospital                     | Imelda        | De Guzman    |
| Liverpool Hospital                     | Jeanny        | Gando        |
| Liverpool Hospital                     | Jeffrey       | Wong         |
| Liverpool Hospital                     | Richard       | Nguyen       |
| Mackay Hospital                        | Roy           | Cherian      |
| Mackay Hospital                        | Raye          | Gillard      |
| Mackay Hospital                        | Rachel        | James        |
| Mater Hospital                         | Michael       | Burke        |
| Mater Hospital                         | Leanne        | Glancy       |
| Mater Hospital                         | Shimbie       | Lewis        |
| Mater Hospital                         | Richard       | Baer         |
| Mater Hospital                         | Sophie        | Wade         |
| Monash Health                          | Kate          | Fitt         |
| Monash Health                          | Peter         | Kerr         |
| Monash Health                          | Kevan         | Polkinghorne |
| Monash Health                          | Mechelle      | Seneviratne  |
| Nepean Hospital                        | Muralikrishna | Komala       |
| Nepean Hospital                        | Junie         | McCourt      |
| Nepean Hospital                        | Craig         | Lawlor       |
| Ipswich Hospital                       | Julia         | Bell         |
| Ipswich Hospital                       | David         | Johnson      |
| Prince of Wales Hospital               | Michaela      | Kelleher     |
| Prince of Wales Hospital               | Sradha        | Kotwal       |
| Princess Alexandra Hospital            | Amanda        | Coburn       |
| Princess Alexandra Hospital            | Sarah         | Guo          |
| Princess Alexandra Hospital            | David         | Johnson      |
| Princess Alexandra Hospital            | Joanna        | Sudak        |
| Princess Alexandra Hospital            | Diana         | Leary        |
| Rockhampton Hospital                   | Jenny         | Anderson     |



| Institution                                | First name    | Last name      |
|--------------------------------------------|---------------|----------------|
| Rockhampton Hospital                       | Thin          | Han            |
| Rockhampton Hospital                       | Tresna        | Titmarsh       |
| Royal Adelaide Hospital                    | Emily         | Adam           |
| Royal Adelaide Hospital                    | Bronwyn       | Hockley        |
| Royal Adelaide Hospital                    | Jenny         | Latte          |
| Royal Adelaide Hospital                    | Yvonne        | Matthew        |
| Royal Adelaide Hospital                    | Stephen       | McDonald       |
| Royal Adelaide Hospital                    | Chen Au       | Peh            |
| Royal Adelaide Hospital                    | Rebecca       | Taylor         |
| Royal Brisbane Hospital                    | David         | McIntyre       |
| Royal Brisbane Hospital                    | Sharadchandra | Ratanjee       |
| Royal Darwin Hospital                      | Karolynn      | Maurice        |
| Royal Darwin Hospital                      | Fiona         | Rettie         |
| Royal Darwin Hospital                      | Madhivanan    | Sundaram       |
| Royal Darwin Hospital                      | Naomi         | Grimshaw       |
| Royal Hobart Hospital                      | Matthew       | Jose           |
| Royal Hobart Hospital                      | Gail          | Read           |
| Royal Melbourne Hospital                   | Jayne         | Amy            |
| Royal Melbourne Hospital                   | Patricia      | Coutts         |
| Royal Melbourne Hospital                   | Maria         | Presno         |
| Royal Melbourne Hospital                   | Nigel         | Toussaint      |
| Royal North Shore Hospital                 | Debbie        | Knagge         |
| Royal North Shore Hospital                 | Colleen       | Van Senden     |
| Royal North Shore Hospital                 | Linh          | Pham           |
| Royal North Shore Hospital                 | Muh Geot      | Wong           |
| Royal Prince Alfred Hospital               | Jane          | Nicholson      |
| Royal Prince Alfred Hospital               | Paul          | Snelling       |
| Sir Charles Gairdner Hospital              | Neil          | Boudville      |
| Sir Charles Gairdner Hospital              | Alison        | Farmer         |
| Sir Charles Gairdner Hospital              | Ingrid        | Holmes         |
| Sir Charles Gairdner Hospital              | Victoria      | Link           |
| Sir Charles Gairdner Hospital              | Vivien        | Perreau        |
| Sir Charles Gairdner Hospital              | Nicole        | Warnecke       |
| St George Hospital                         | Sunil         | Badve          |
| St George Hospital                         | Yanella       | Martinez-Smith |
| St George Hospital                         | Jayson        | Catiwa         |
| St Vincent's Hospital                      | Frank         | Ierino         |
| St Vincent's Hospital                      | Emmet         | O'flaherty     |
| Sunshine Coast Hospital and Health Service | Nicholas      | Gray           |
| Sunshine Coast Hospital and Health Service | Gerald        | Hilder         |
| Sunshine Coast Hospital and Health Service | Kaylene       | Wadd           |
| Sunshine Coast Hospital and Health Service | Andrea        | Pollock        |
| Sunshine Coast Hospital and Health Service | Stanley       | Searle         |
| Tamworth Hospital                          | Cheryl        | Wertheim       |

| Institution                            | First name   | Last name      |
|----------------------------------------|--------------|----------------|
| Tamworth Hospital                      | Stephen      | May            |
| Tamworth Hospital                      | Jill         | Telfer         |
| The George Institute for Global Health | Martin       | Gallagher      |
| The George Institute for Global Health | Sradha       | Kotwal         |
| The George Institute for Global Health | Sarah        | Coggan         |
| The George Institute for Global Health | Casey        | Yates          |
| The George Institute for Global Health | Kathryn      | Higgins        |
| The George Institute for Global Health | Earl         | James          |
| The George Institute for Global Health | Alison       | Coenen         |
| The George Institute for Global Health | Kris         | Rogers         |
| The George Institute for Global Health | Gian Luca    | Di Tanna       |
| The George Institute for Global Health | Jayanthi     | Mysore         |
| The George Institute for Global Health | Joseph Alvin | Santos         |
| The George Institute for Global Health | Benjamin     | Talbot         |
| The George Institute for Global Health | Katrina      | Thistlethwaite |
| The George Institute for Global Health | Bruce        | Neal           |
| Toowoomba Hospital                     | Elizabeth    | Coroneos       |
| Toowoomba Hospital                     | Shannon      | Nugent         |
| Toowoomba Hospital                     | Ian          | Fox            |
| Toowoomba Hospital                     | Sree         | Venuthurupalli |
| Western Health                         | Jennifer     | Connor         |
| Western Health                         | Ruth         | Thachaw        |
| Western Health                         | Sandra       | Crikis         |
| Wollongong Hospital                    | Pauline      | Byrne          |
| Wollongong Hospital                    | Karumathil   | Murali         |
| Wollongong Hospital                    | Hicham       | Cheikh Hassan  |
| Western Sydney Local Health District   | Lin          | Huang          |
| Western Sydney Local Health District   | Romiereeza   | Dizon          |
| Western Sydney Local Health District   | Deepika      | Joshi          |
| Western Sydney Local Health District   | Jon          | Mendoza        |
| Western Sydney Local Health District   | Bishi        | Augustine      |
| Western Sydney Local Health District   | Disha        | Balraj         |
| Western Sydney Local Health District   | Vincent      | Lee            |
| Western Sydney Local Health District   | David        | O'Donnell      |

## 2.2 Steering committee members

All above listed site investigators participated in the Steering Committee.

## 2.3 Trial Executive Management Committee members

Martin Gallagher; Sradha Kotwal; Sarah Coggan; Kevan Polkinghorne; Nicholas Gray; Girish Talaulikar; Alan Cass; Stephen McDonald; Stephen Jan

## 2.4 Data Collection Sub-committee members

Stephen McDonald; Sradha Kotwal; Sharad Ratanjee; Debbie Knagge, Marieke Veenendaal, Paul Snelling

## 2.5 Engagement Sub-committee members

Nicholas Gray; Sradha Kotwal; Girish Talaulikar; Suda Swaminathan; Leanne Brown; Karolynn Maurice; Maree Ross-Smith; Steve May

## 2.6 Interventions Sub-committee members

Kevan Polkinghorne; Sradha Kotwal; David Johnson; Emma Marsh; Madhivanan Sundaram; Peter Mount; Vincent Lee; Suda Swaminathan; Pamela Lopez-Vargas (representative of Caring for Australasians with Renal Impairment).

## 2.7 Study Adjudicators

Ben Talbot; David Semple; Peter Kerr; Matthew Roberts

The data collection tool was custom made for the REDUCTION study and was developed by The Project Factory (<https://www.theprojectfactory.com/>) together with The George Institute study team.
